# Supplementary material
Source: publisher figshare collection journal article supplement (https://sage.figshare.com/ndownloader/files/18044495)

Supplementary Material for: Measuring Urban Social Sustainability: Scale Development and Validation

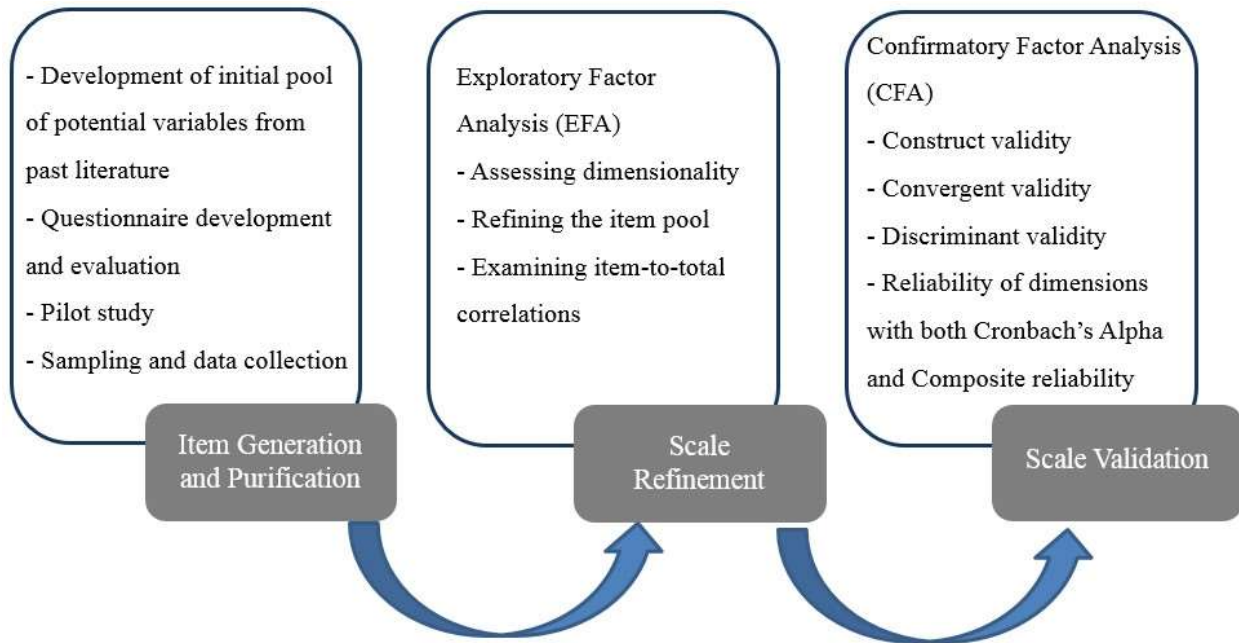

**Figure S1.** Different stages of using factor analysis

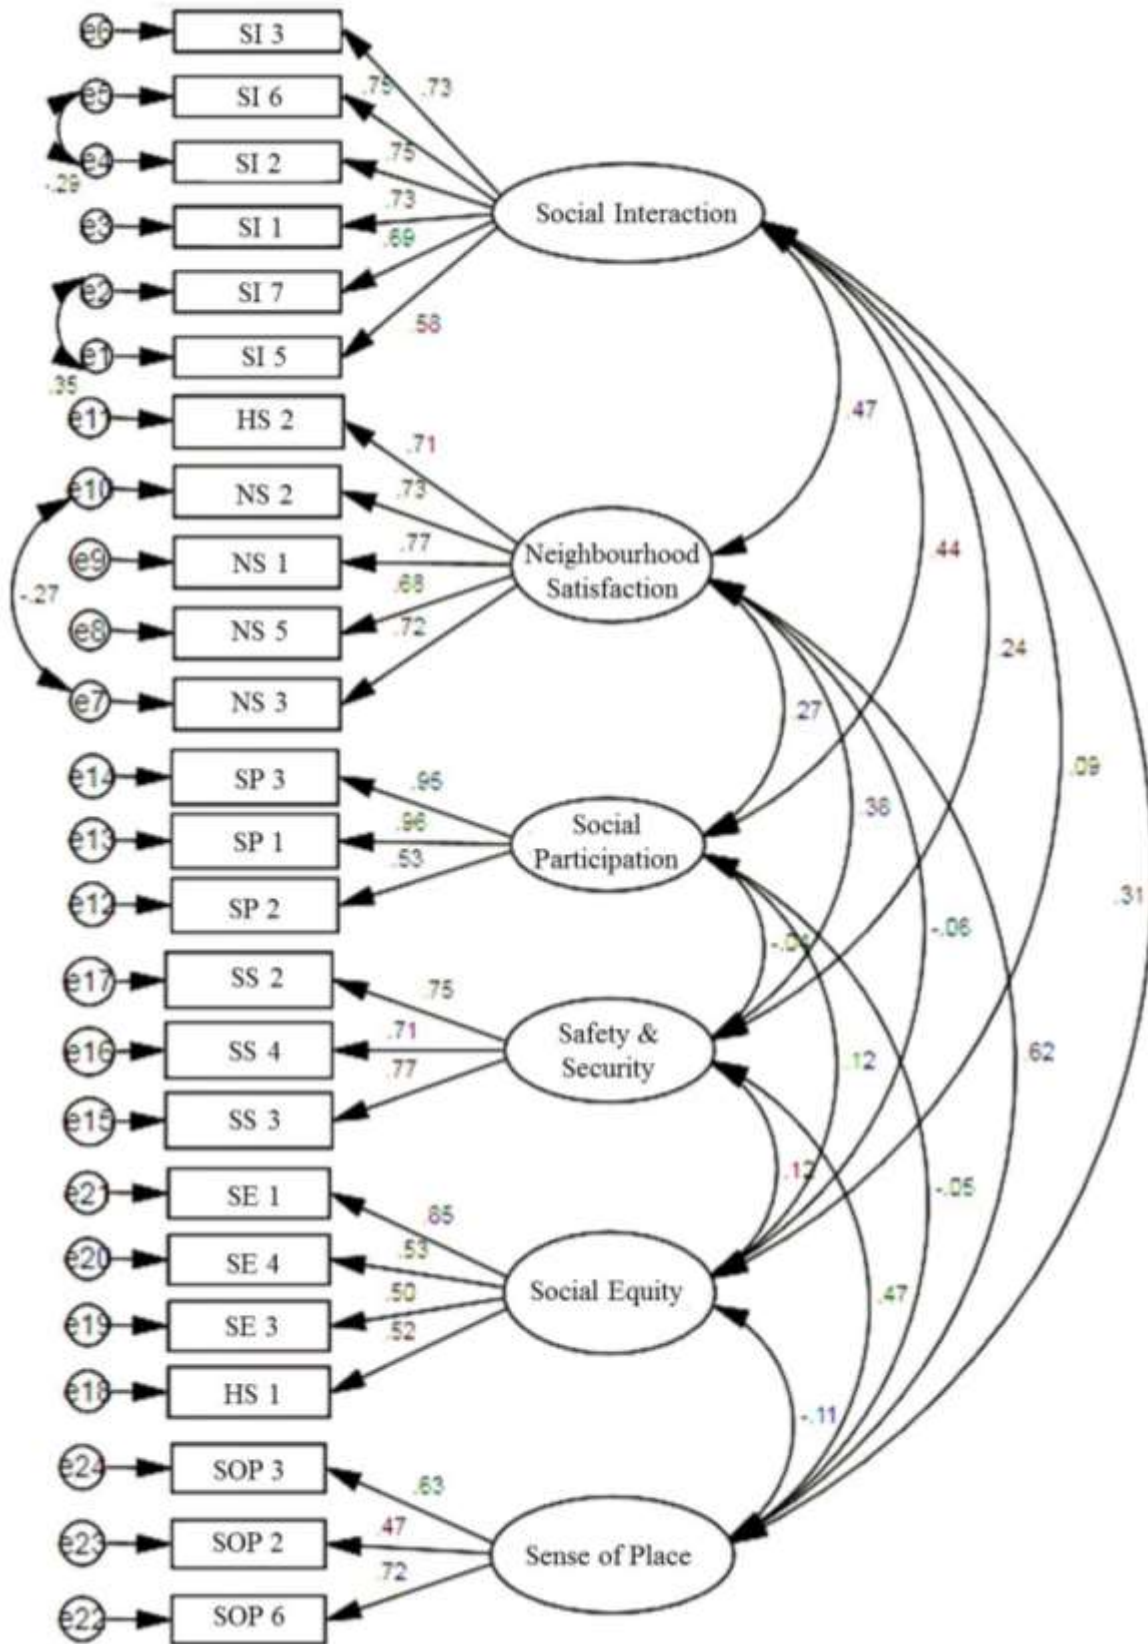

**Figure S2.** Factorial structure of the urban social sustainability measurement scale

**Table SI.** Key researchers and their viewpoints about the dimensions of social sustainability

|                                              | <i>Social<br/>Interactio<br/>n</i> | <i>Safety &amp;<br/>Security</i> | <i>Housing<br/>satisfactio<br/>n</i> | <i>Social<br/>Equity</i> | <i>Social<br/>Participatio<br/>n</i> | <i>Neighbourhood<br/>Satisfaction</i> | <i>Sense<br/>of<br/>place</i> |
|----------------------------------------------|------------------------------------|----------------------------------|--------------------------------------|--------------------------|--------------------------------------|---------------------------------------|-------------------------------|
| <i>Yiftachel and<br/>Hedgcock<br/>(1993)</i> | ✓                                  |                                  |                                      |                          | ✓                                    |                                       | ✓                             |
| <i>Forrest and<br/>Kearns (2001)</i>         |                                    | ✓                                | ✓                                    | ✓                        |                                      | ✓                                     |                               |
| <i>Burton et al.<br/>(2003)</i>              |                                    |                                  |                                      | ✓                        |                                      | ✓                                     |                               |
| <i>Littig and<br/>Griessler (2005)</i>       |                                    | ✓                                |                                      |                          | ✓                                    |                                       | ✓                             |
| <i>Bramley et al.<br/>(2006)</i>             | ✓                                  | ✓                                |                                      | ✓                        | ✓                                    | ✓                                     | ✓                             |
| <i>Chan and Lee<br/>(2008)</i>               | ✓                                  | ✓                                |                                      |                          |                                      |                                       | ✓                             |
| <i>(Karuppannan<br/>and Sivam,<br/>2011)</i> | ✓                                  |                                  | ✓                                    | ✓                        |                                      | ✓                                     |                               |
| <i>Ghahramanpou<br/>ri et al. (2015)</i>     | ✓                                  | ✓                                | ✓                                    | ✓                        | ✓                                    | ✓                                     |                               |
| <i>Colantonio<br/>(2016)</i>                 | ✓                                  | ✓                                |                                      | ✓                        | ✓                                    | ✓                                     |                               |
| <i>Eizenberg and<br/>Jabareen<br/>(2017)</i> | ✓                                  | ✓                                |                                      | ✓                        | ✓                                    |                                       |                               |

**Table S2.** Neighbourhood boundary map, aerial map, and images of each case study neighbourhood

| Neighbourhood | An overview of five case study neighbourhoods                                       |                                                                                      |  |  |
|---------------|-------------------------------------------------------------------------------------|--------------------------------------------------------------------------------------|--|--|
| Caversham     |    |    |  |  |
|               |                                                                                     |    |  |  |
|               |                                                                                     |   |  |  |
|               |                                                                                     |                                                                                      |  |  |
| Green Island  |  |  |  |  |
|               |                                                                                     |   |  |  |
|               |                                                                                     |  |  |  |
|               |                                                                                     |                                                                                      |  |  |



Concord

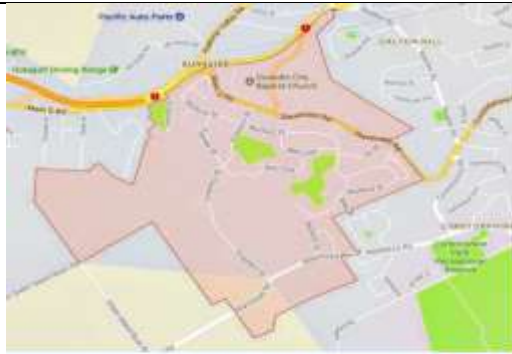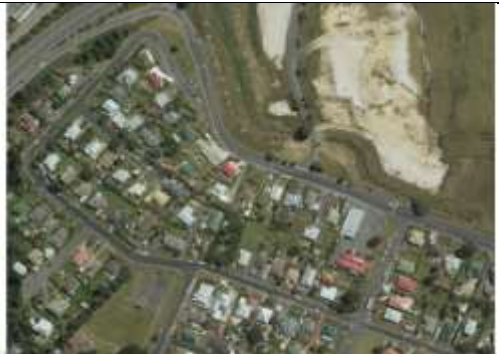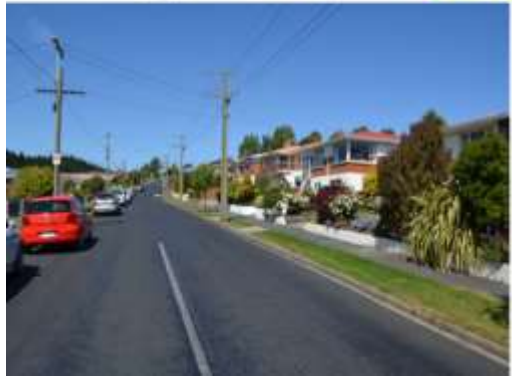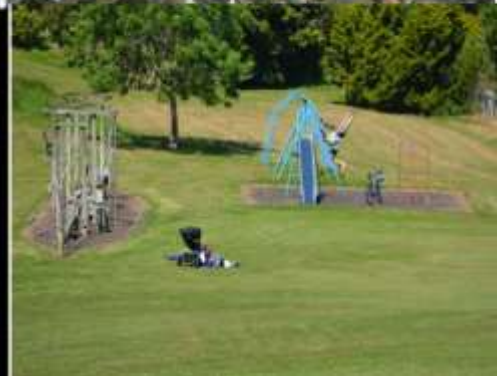

Opoho

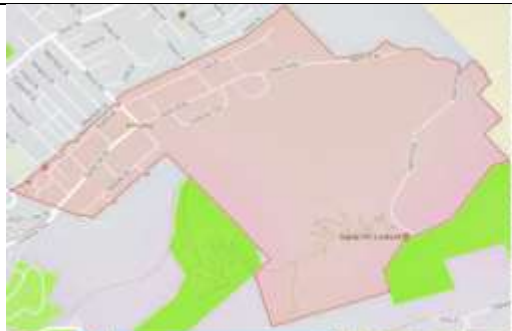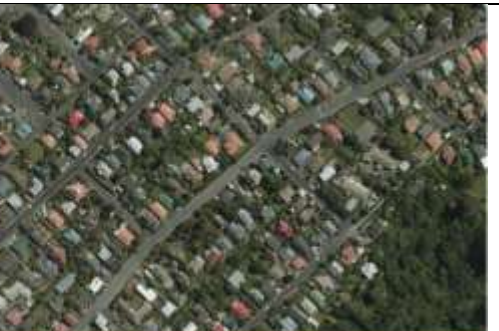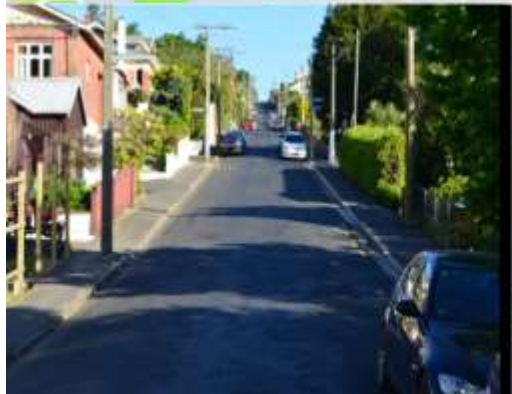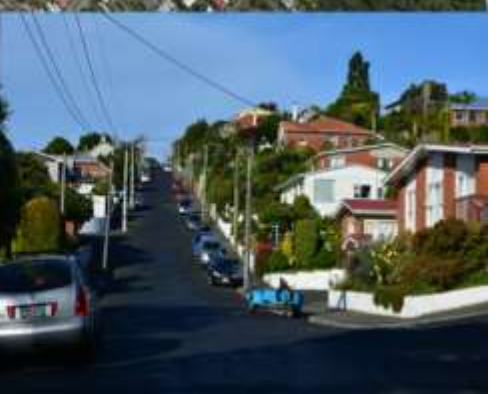

Maori Hill

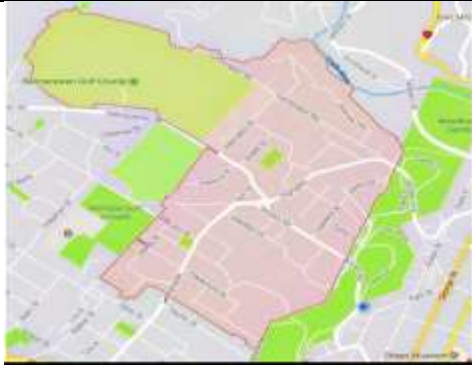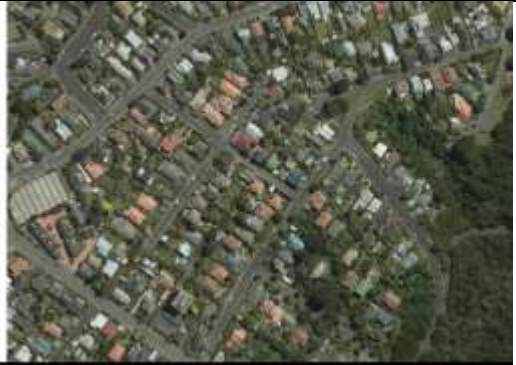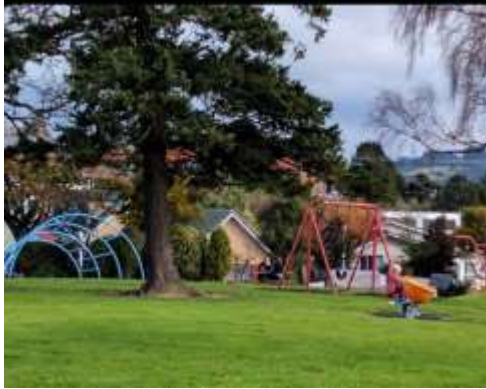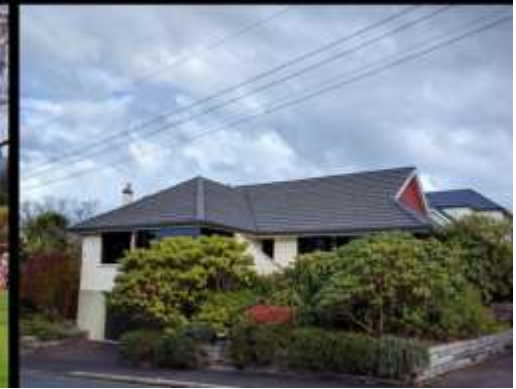

Supplement: Supplementary file 1 [file 18044495]
